# Supplementary material for: Diagnosis of Ion-Exchange Resin Depositions in Paraffin Sections Using Corrective Light and Electron Microscopy-NanoSuit Method
Source: MDPI journal article supplement (doi:10.3390/diagnostics11071193), 2021-06-30
Supplement: s1 [file s1]

## Supplemental Material

**Supplementary Table S1.** List of weight percentage (wt%) of elements detected by SEM-EDS analysis using the NanoSuit-CLEM method.

|           |            | C     | O     | S     | K    | P    | La    | N     |
|-----------|------------|-------|-------|-------|------|------|-------|-------|
| Patient 1 | deposition | 39.1  | 41.48 | 17.16 | 1.9  | 0.35 | 0     | 0     |
|           | background | 46.88 | 47.37 | 1.13  | 1.14 | 1.52 | 0.06  | 1.9   |
| Patient 2 | deposition | 52.76 | 25.04 | 21.69 | 0.18 | 0.34 | 0     | 0     |
|           | background | 59.94 | 29.52 | 1.26  | 0.94 | 0.66 | 0     | 7.68  |
| Patient 3 | deposition | 53.56 | 31.63 | 14.01 | 0.25 | 0.41 | 0.13  | 0     |
|           | background | 52.91 | 36.09 | 0.81  | 0.5  | 0.94 | 0     | 8.75  |
| Patient 4 | deposition | 51.47 | 27.75 | 19.87 | 0.27 | 0.44 | 0     | 0.2   |
|           | background | 46.24 | 44.04 | 0.89  | 0.79 | 0.85 | 0.38  | 6.81  |
| Patient 5 | deposition | 26.16 | 32.21 | 0.39  | 0.32 | 8.26 | 32.65 | 0     |
|           | background | 54.59 | 32.12 | 0.74  | 0.21 | 1.48 | 0.23  | 10.73 |
| Patient 6 | deposition | 53.71 | 22.56 | 21.41 | 0.8  | 0.66 | 0     | 0.86  |
|           | background | 51.75 | 36.03 | 0.42  | 0.98 | 1.35 | 0     | 9.48  |
| Patient 7 | deposition | 49.66 | 25.65 | 21.61 | 0.3  | 0.44 | 0.09  | 2.24  |
|           | background | 55.58 | 35.59 | 1.13  | 1.54 | 3.59 | 0     | 2.56  |
| Patient 8 | deposition | 39.25 | 35.12 | 24.22 | 0.55 | 0.8  | 0.05  | 0     |
|           | background | 44.7  | 48.4  | 0.26  | 1.49 | 1.42 | 0.39  | 3.29  |
| Patient 9 | deposition | 47.61 | 36.37 | 15.43 | 0.25 | 0.34 | 0     | 0     |
|           | background | 48.87 | 41.22 | 0.43  | 0.56 | 0.47 | 0     | 8.46  |

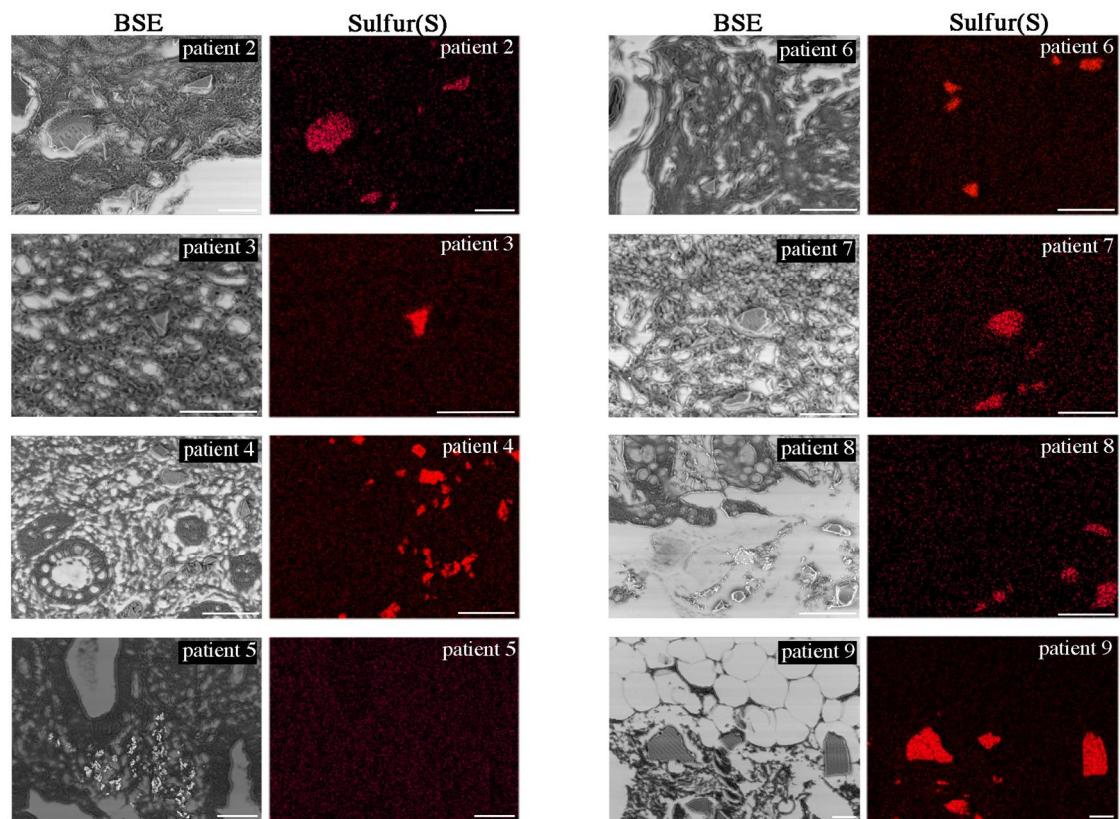

**Supplementary Figure S1.** The results detecting sulfur deposition in the gastrointestinal mucosa by SEM-EDS analysis using the NanoSuit-CLEM method (cases 2–9). Images in the left column are back-scattered electron (BSE) SEM images and images in the right column are EDS maps of sulfur. Red color represents sulfur deposition. White bar, 50  $\mu\text{m}$ .

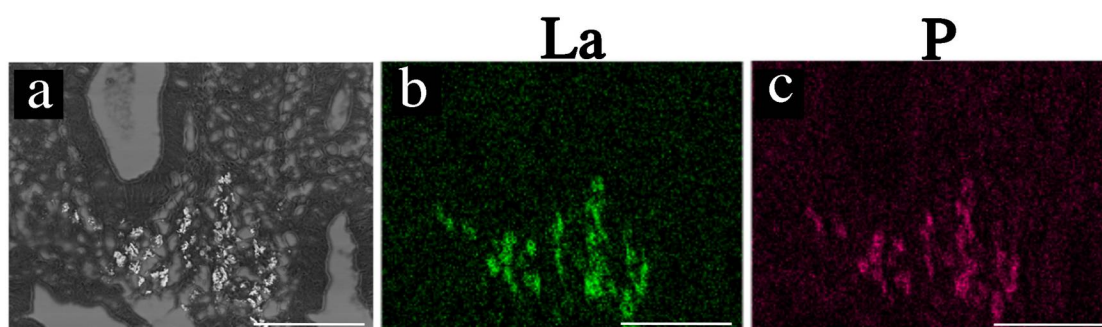

**Supplementary Figure S2.** The results detecting lanthanum and phosphorus deposition in the gastric mucosa by SEM-EDS analysis using the NanoSuit-CLEM method (case 5). Images in the left column are backscattered SEM images showing a bright area in the mucosa. The middle- and right-column images are elemental mapping images using SEM-EDS analysis showing the deposition of lanthanum (La) and phosphorus (P), respectively. White bars represent 100  $\mu\text{m}$ .

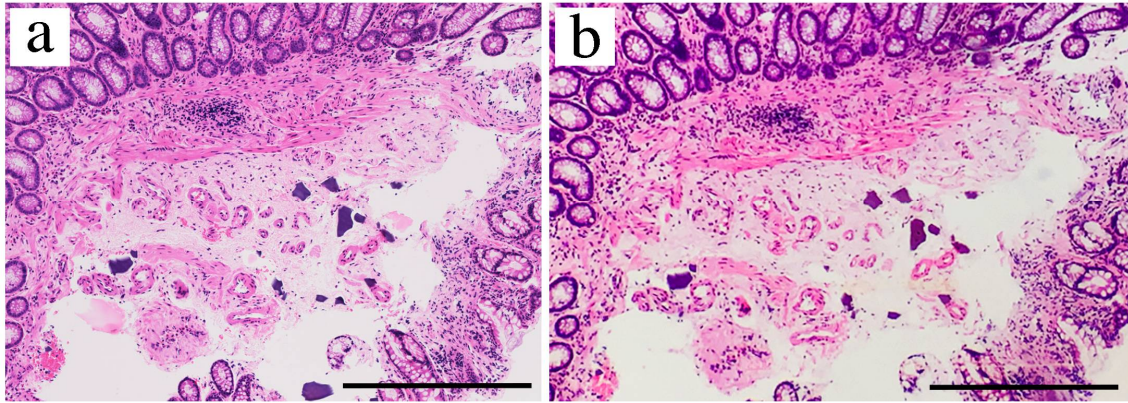

**Supplementary Figure S3.** Comparison of H&E staining between pre- and post-EDS analysis. H&E staining of (a) pre- and (b) post-EDS analysis. Bars represent 50  $\mu\text{m}$

**Supplementary Data 1.** Comparison with weight percentage (wt%) of carbon and phosphorous detected between Sevelamer and Cholestyramine.

| Sevelamer   |             |            |  | Cholestyramine |             |            |
|-------------|-------------|------------|--|----------------|-------------|------------|
| C(weight %) | P(weight %) | P/C        |  | C(weight %)    | P(weight %) | P/C        |
| 82.19       | 17.81       | 0.21669303 |  | 93.13          | 6.87        | 0.07376785 |
| 81.8        | 18.2        | 0.22249389 |  | 91.22          | 8.78        | 0.09625082 |
| 74.83       | 25.17       | 0.33636242 |  | 88.52          | 11.48       | 0.12968821 |
| 89.27       | 10.78       | 0.12075725 |  | 89.29          | 10.71       | 0.11994624 |
| 81.1        | 18.9        | 0.23304562 |  | 92.16          | 7.84        | 0.08506944 |
| 86.74       | 13.26       | 0.15287065 |  | 96.52          | 3.48        | 0.0360547  |
| 85.13       | 14.83       | 0.17420416 |  | 93.34          | 6.66        | 0.07135205 |
| 82.49       | 17.51       | 0.21226815 |  | 92.79          | 7.21        | 0.07770234 |
| 83.77       | 16.23       | 0.19374478 |  | 88.16          | 11.84       | 0.13430127 |
| 81.96       | 18.04       | 0.22010737 |  | 95.41          | 4.59        | 0.04810816 |
| 81.49       | 18.51       | 0.22714443 |  | 92.4           | 5.8         | 0.06277056 |
| 84.84       | 15.16       | 0.1786893  |  | 96.96          | 3.04        | 0.03135314 |
| 86.76       | 13.24       | 0.15260489 |  | 96.39          | 3.61        | 0.03745202 |
| 77.96       | 22.04       | 0.28270908 |  | 96.67          | 3.33        | 0.03444709 |
| 84.18       | 15.82       | 0.18793062 |  | 96.56          | 3.44        | 0.03562552 |
| 84.8        | 15.2        | 0.17924528 |  | 92.42          | 7.58        | 0.08201688 |
| 84.15       | 15.85       | 0.18835413 |  | 92             | 8           | 0.08695652 |
| 82.79       | 17.21       | 0.20787535 |  | 91.22          | 8.78        | 0.09625082 |
| 80.59       | 19.41       | 0.24084874 |  | 96.14          | 3.86        | 0.04014978 |
| 83.34       | 16.66       | 0.19990401 |  | 92.43          | 7.57        | 0.08189982 |
